# Supplementary material for: A chromosome-scale genome assembly of the false clownfish, Amphiprion ocellaris
Source: bioRxiv or medRxiv preprint supplement (doi:10.1101/2022.01.16.476524), 2022-01-17

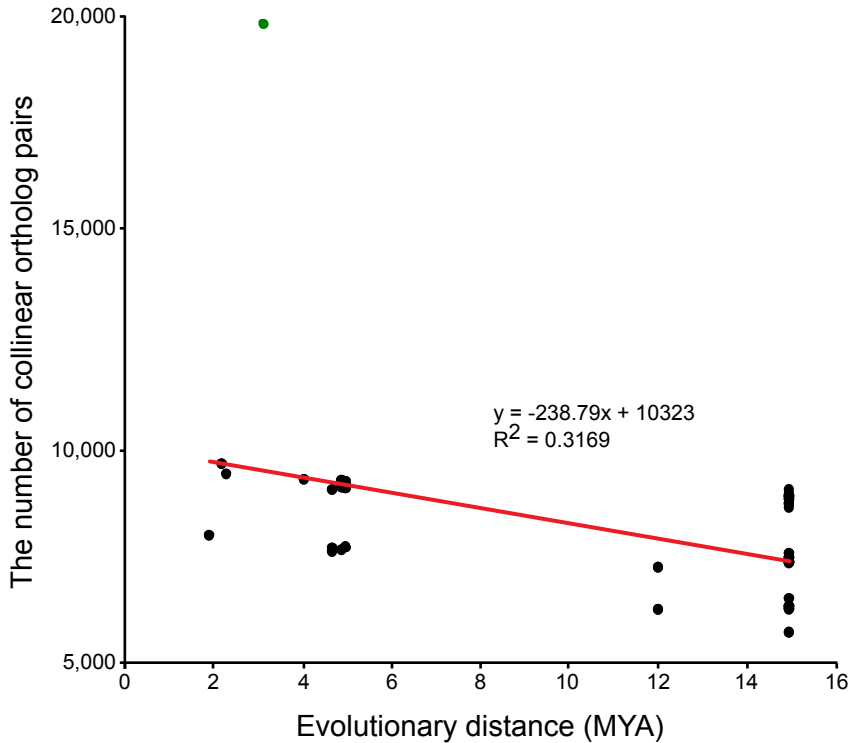

Supplement: Supplementary file [file media-4.pdf]
