# Supplementary material for: A chromosome-scale genome assembly of the false clownfish, Amphiprion ocellaris
Source: bioRxiv or medRxiv preprint supplement (doi:10.1101/2022.01.16.476524), 2022-01-17
Supplement: Supplementary file [file media-5.pdf]

*A. ocellaris*

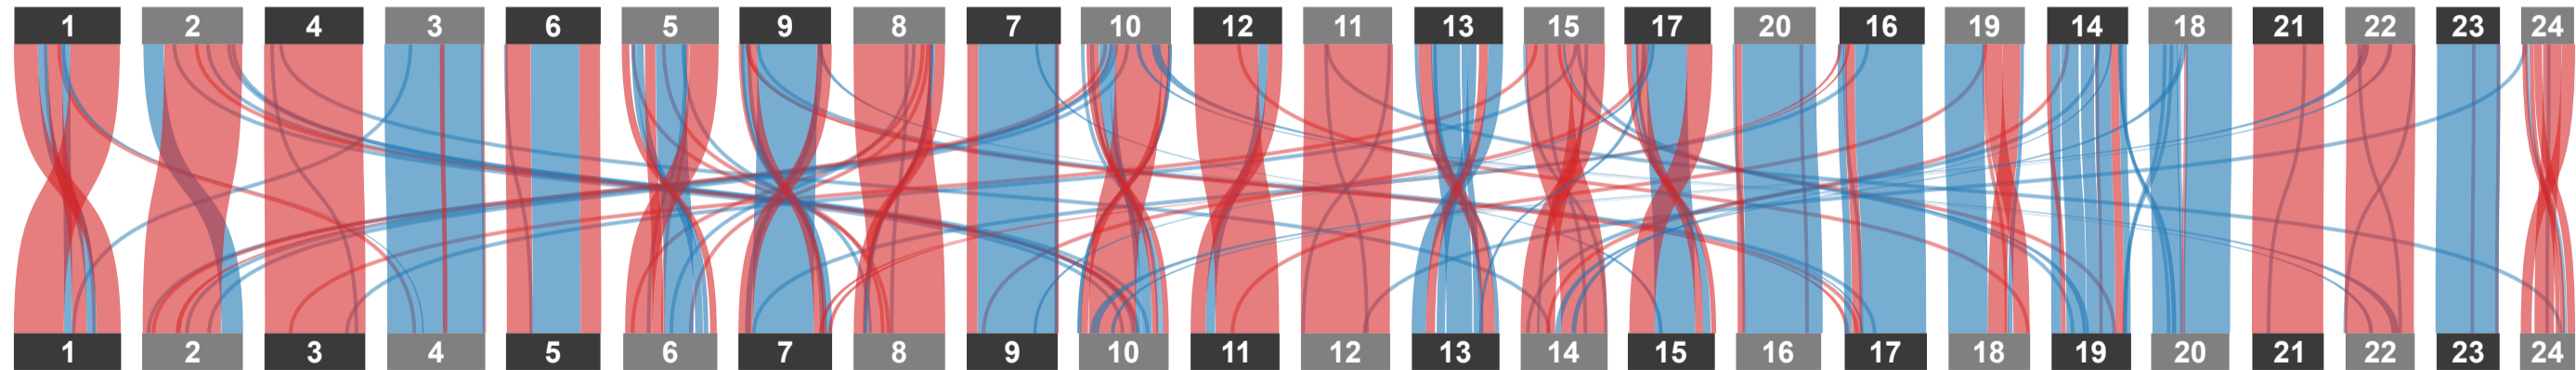

*A. percula*
